# Supplementary material for: Insights into the Novel FAD2 Gene Regulating Oleic Acid Accumulation in Peanut Seeds with Different Maturity
Source: MDPI journal article supplement (doi:10.3390/genes13112076), 2022-11-09
Supplement: s1 [file s1]

Table S1 Primers for gene cloning, and qRT-PCR

| primer name | ID of PeanutBase                                | Forward primer sequence<br>(5'-3') | Forward primer sequence<br>(5'-3') |
|-------------|-------------------------------------------------|------------------------------------|------------------------------------|
| FAD2-7      | <i>Arahy.BY45PL</i>                             | ATGGGAGCTGGCGGCCG<br>AA            | ACTTGGACAGCAGCTCT<br>AGTC          |
| FAD2-8      | <i>Arahy.SIY1PZ</i>                             | ATGGGGTCTGGTGGTCA<br>TTCT          | CCTCACACTTAAAGCTTA<br>TTATACC      |
| FAD2-9      | <i>Arahy.9P5B67</i>                             | ATGGGGTCTGGGGGTCA<br>TTC           | CACTTAAAGCTTATTATA<br>CCAAAGA      |
| AhFAD2A/B   | <i>Arahy.42CZAS.1/</i><br><i>Arahy.5913QL.1</i> | GATTGAAGCTCAAAAGA<br>AGCCTCT       | TGTAGAAGAGTAAGTAG<br>GCCACT        |
| AhFAD2-3    |                                                 | ATGCATGCTTTCTTGTC<br>ATTGAAG       | AGAGAACGTTCAAAGCA<br>ATGTGGT       |
| AhFAD2-7    | <i>Arahy.BY45PL</i>                             | AACCTCTGTTCTCCTTCA<br>AACA         | ATAGTAGAGGCAAAAGG<br>CTATGGT       |
| AhFAD2-8    | <i>Arahy.SIY1PZ</i>                             | CATCACACTATCAGTTAC<br>TCTCTTT      | ATAGAACGCGGCCAGGA<br>CAC           |
| AhFAD2-9    | <i>Arahy.9P5B67</i>                             | CTCTGGAGAGAGGCCA<br>AAGA           | AGCCAACTACGATATATA<br>GCGAT        |

Table S2 Protein information of new members of FAD2

| Gene            | ORF<br>(bp) | Chromosome | Lenth of<br>Protein/aa | MW/kDa | pI   | Location                 |
|-----------------|-------------|------------|------------------------|--------|------|--------------------------|
| <i>AhFAD2-7</i> | 1152        | B06        | 383                    | 43.8   | 8.8  | Endoplasmic<br>reticulum |
| <i>AhFAD2-8</i> | 1164        | A09        | 387                    | 45.0   | 8.96 | Endoplasmic<br>reticulum |
| <i>AhFAD2-9</i> | 1164        | B09        | 387                    | 45.1   | 9.04 | Endoplasmic<br>reticulum |

Table S3 Fatty acid composition of transformed INVSc1

| Transformant | Oleic acid (%) | Linoleic acid (%) |
|--------------|----------------|-------------------|
| pYES2        | 12.87          | 1.70              |
| pYFAD2-7     | 13.42          | 10.44             |
| pYFAD2-8     | 47.22          | 49.14             |
| pYFAD2-9     | 55.79          | 57.03             |

Table S4 Determination of fatty acids in transgenic Arabidopsis

|             | Oleic acid (%) | Linoleic acid (%) |
|-------------|----------------|-------------------|
| WT          | 11.63          | 31.01             |
| <i>fad2</i> | 57.28          | 2.56              |
| AhFAD2-7    | 44.23          | 7.49              |
| AhFAD2-8    | 51.45          | 3.82              |
| AhFAD2-9    | 39.60          | 13.06             |
